# Supplementary material
Source: PubMed Central journal article supplement (PMC3731031)
Supplement: NIHMS487936-supplement-01.pdf [file NIHMS487936-supplement-01.pdf]

**S1: Appendix: Selection, diagnosis, and treatment codes used in the creation and classification of ovarian patients in SEER-Medicare.**

| Procedure                                                                                                                                                                                                                                                                                                                                                  | ICD-9 procedure code                                                                                                                                                                                                                    | ICD-9 diagnosis code | HCPCS/CPT                                                                                                                                                |
|------------------------------------------------------------------------------------------------------------------------------------------------------------------------------------------------------------------------------------------------------------------------------------------------------------------------------------------------------------|-----------------------------------------------------------------------------------------------------------------------------------------------------------------------------------------------------------------------------------------|----------------------|----------------------------------------------------------------------------------------------------------------------------------------------------------|
| Gastroenterostomy, enteroenterostomy (bypass)                                                                                                                                                                                                                                                                                                              | 44.3, 44.31, 44.38, 44.39                                                                                                                                                                                                               |                      | 43820, 44130                                                                                                                                             |
| Gastrostomy, feeding jejunostomy                                                                                                                                                                                                                                                                                                                           | 43.1, 43.11, 43.19, 46.32, 46.39                                                                                                                                                                                                        |                      | 43246, 43750, 43832, 44015, 44372, 43653, 43830, 43832, 44015, 44186, 44372, 44373,                                                                      |
| TPN                                                                                                                                                                                                                                                                                                                                                        | 99.15                                                                                                                                                                                                                                   |                      | 99601, 99602                                                                                                                                             |
| Excision of small or large intestine                                                                                                                                                                                                                                                                                                                       | 45.6, 45.61, 45.62, 45.63                                                                                                                                                                                                               |                      | 44120, 44125, 44140, 44145, 44147, 44157, 44158, 44160, 44202, 44204, 44205, 44207, 44211, 44625, 44626                                                  |
| Excision of large intestine                                                                                                                                                                                                                                                                                                                                | 45.7, 45.71, 45.72, 45.73, 45.74, 45.75, 45.76, 45.78, 45.79, 45.8, 48.4, 48.41, 48.49, 48.5, 48.6, 48.61, 48.62, 48.63, 48.64, 48.65, 48.69                                                                                            |                      |                                                                                                                                                          |
| Enterostomy (colostomy, ileostomy)                                                                                                                                                                                                                                                                                                                         | 46.0, 46.01, 46.02, 46.03, 46.1, 46.10, 46.11, 46.13, 46.14, 46.2, 46.20, 46.21, 46.22, 46.23, 46.24                                                                                                                                    |                      | 44021, 44141, 44143, 44144, 44146, 44150, 44210, 44151, 44155, 44156, 44187, 44310, 44188, 44320, 44206, 44208, 44210, 44212, 44300, 44310, 44316, 44320 |
| Diagnostic laparotomy/laparoscopy                                                                                                                                                                                                                                                                                                                          | 54.1, 54.11, 54.2, 54.21                                                                                                                                                                                                                |                      | 49000, 49320 49321                                                                                                                                       |
| Lysis of peritoneal adhesions                                                                                                                                                                                                                                                                                                                              | 54.5, 54.51                                                                                                                                                                                                                             |                      | 44005, 44180,                                                                                                                                            |
| Tumor resection at diagnosis                                                                                                                                                                                                                                                                                                                               | 54.4, 65.2, 65.3, 65.31, 65.39, 65.4, 65.41, 65.42, 65.5, 65.51, 65.52, 65.53, 65.54, 65.6, 65.61, 65.62, 65.63, 65.64, 68.31, 68.39, 68.4, 68.41, 68.49, 68.5, 68.51, 68.59, 68.6, 68.61, 68.69, 68.7, 68.71, 68.79, 68.8, 68.9, 70.32 |                      |                                                                                                                                                          |
| **Based on Charlson-Klabunde Index: ICD-9 diagnosis of myocardial infarction; congestive heart failure; peripheral vascular disease; cerebrovascular disease; dementia; chronic pulmonary disease; connective tissue disease; mild to severe liver disease; diabetes with/without end-organ damage; hemiplegia; moderate to severe renal disease; or AIDS. |                                                                                                                                                                                                                                         |                      |                                                                                                                                                          |
